# Supplementary material for: Searching for the definition of macrosomia through an outcome-based approach in low- and middle-income countries: a secondary analysis of the WHO Global Survey in Africa, Asia and Latin America
Source: PubMed Central journal article supplement (PMC4669645; doi:10.1186/s12884-015-0765-z), 2015-12-03
Supplement: 12884_2015_765_MOESM1_ESM.pdf [file 12884_2015_765_MOESM1_ESM.pdf]

**Additional Table 1 Maternal characteristics by region and birthweight in singleton term births**

| Birthweight          | n            | Age ( $\geq 35$ years, %) | Marital status (married/cohabiting, %) | Education ( $\geq 13$ years, %) | Obesity (%) <sup>a</sup> | Diabetes (%) <sup>b</sup> | Parity ( $>1$ , %) | Infant sex (male, %) |
|----------------------|--------------|---------------------------|----------------------------------------|---------------------------------|--------------------------|---------------------------|--------------------|----------------------|
| <b>Africa</b>        | <b>67546</b> | <b>13.6</b>               | <b>88.6</b>                            | <b>13.1</b>                     | <b>13.2</b>              | <b>0.4</b>                | <b>68.2</b>        | <b>51.4</b>          |
| <2500                | 3267         | 10.4                      | 83.4                                   | 8.2                             | 6.3                      | 0.4                       | 54.3               | 43.1                 |
| 2500–2999            | 14747        | 10.5                      | 84.5                                   | 10.9                            | 7.5                      | 0.3                       | 59.8               | 44.8                 |
| 3000–3499            | 28788        | 12.4                      | 88.5                                   | 12.9                            | 11.5                     | 0.3                       | 67.9               | 51.0                 |
| 3500–3999            | 15824        | 16.3                      | 91.6                                   | 15.5                            | 18.7                     | 0.4                       | 74.7               | 57.0                 |
| 4000–4499            | 4126         | 21.2                      | 94.9                                   | 16.5                            | 25.8                     | 1.1                       | 82.0               | 60.2                 |
| 4500–4999            | 648          | 28.4                      | 95.4                                   | 17.4                            | 35.5                     | 1.5                       | 85.2               | 63.0                 |
| $\geq 5000$          | 146          | 43.2                      | 99.3                                   | 11.6                            | 43.8                     | 5.5                       | 92.4               | 66.4                 |
| <b>Asia</b>          | <b>91595</b> | <b>8.7</b>                | <b>93.5</b>                            | <b>17.5</b>                     | <b>9.8</b>               | <b>0.8</b>                | <b>56.8</b>        | <b>52.2</b>          |
| <2500                | 7723         | 7.6                       | 91.2                                   | 11.4                            | 5.2                      | 0.8                       | 49.3               | 45.0                 |
| 2500–2999            | 31561        | 7.9                       | 91.9                                   | 14.4                            | 6.5                      | 0.7                       | 52.5               | 47.4                 |
| 3000–3499            | 36479        | 8.8                       | 94.0                                   | 19.4                            | 10.1                     | 0.7                       | 58.7               | 53.9                 |
| 3500–3999            | 13539        | 10.0                      | 96.4                                   | 22.4                            | 16.1                     | 1.2                       | 64.0               | 60.4                 |
| 4000–4499            | 2041         | 12.4                      | 97.4                                   | 23.4                            | 26.9                     | 2.6                       | 72.6               | 66.4                 |
| 4500–4999            | 200          | 18.0                      | 96.5                                   | 17.5                            | 42.0                     | 4.5                       | 74.5               | 67.5                 |
| $\geq 5000$          | 52           | 28.9                      | 92.3                                   | 26.9                            | 30.8                     | 9.6                       | 57.7               | 63.5                 |
| <b>Latin America</b> | <b>87518</b> | <b>10.4</b>               | <b>77.2</b>                            | <b>10.8</b>                     | <b>22.2</b>              | <b>0.7</b>                | <b>65.5</b>        | <b>50.2</b>          |
| <2500                | 3516         | 9.6                       | 74.0                                   | 9.8                             | 15.2                     | 0.5                       | 58.9               | 43.0                 |
| 2500–2999            | 19374        | 9.0                       | 74.7                                   | 9.7                             | 16.3                     | 0.6                       | 60.3               | 42.7                 |
| 3000–3499            | 38930        | 9.9                       | 77.2                                   | 10.7                            | 20.7                     | 0.6                       | 64.8               | 49.4                 |
| 3500–3999            | 20875        | 11.4                      | 79.5                                   | 11.6                            | 27.7                     | 0.8                       | 70.2               | 56.8                 |
| 4000–4499            | 4199         | 14.8                      | 80.2                                   | 12.6                            | 37.1                     | 1.7                       | 76.1               | 63.1                 |
| 4500–4999            | 569          | 19.2                      | 79.4                                   | 13.7                            | 48.7                     | 4.1                       | 83.8               | 64.0                 |
| $\geq 5000$          | 55           | 30.9                      | 81.8                                   | 18.2                            | 43.6                     | 9.1                       | 81.8               | 67.3                 |

All variables differed significantly by birthweight categories ( $\chi^2_{CMH}, P < 0.0001$ ).

a: Obesity is defined as body mass index  $\geq 30$  kg/m<sup>2</sup>.

b: Pre-existing diabetes.
