# Supplementary material for: Searching for the definition of macrosomia through an outcome-based approach in low- and middle-income countries: a secondary analysis of the WHO Global Survey in Africa, Asia and Latin America
Source: PubMed Central journal article supplement (PMC4669645; doi:10.1186/s12884-015-0765-z), 2015-12-03
Supplement: 12884_2015_765_MOESM2_ESM.pdf [file 12884_2015_765_MOESM2_ESM.pdf]

**Additional Table 2 Top three indications for caesarean section in suspected macrosomic infants**

|                               | Africa (%)                            | Asia (%)                              | Latin America (%)                     |
|-------------------------------|---------------------------------------|---------------------------------------|---------------------------------------|
| <b>Birthweight</b>            |                                       |                                       |                                       |
| <b>(g)</b>                    |                                       |                                       |                                       |
| 4000–4499                     | Cephalopelvic disproportion<br>(47.9) | Cephalopelvic disproportion<br>(41.2) | Cephalopelvic disproportion<br>(44.2) |
|                               | Fetal distress (27.9)                 | Any other fetal indication<br>(18.8)  | Previous caesarean section<br>(27.5)  |
|                               | Previous caesarean section<br>(26.5)  | Maternal request (16.9)               | Fetal distress (18.6)                 |
| 4500–4999                     | Cephalopelvic disproportion<br>(51.5) | Cephalopelvic disproportion<br>(47.2) | Cephalopelvic disproportion<br>(48.5) |
|                               | Previous caesarean section<br>(27.5)  | Any other fetal indication<br>(31.7)  | Previous caesarean section<br>(27.0)  |
|                               | Fetal distress (25.4)                 | Fetal distress (15.5)                 | Any other fetal indication<br>(18.7)  |
| ≥5000                         | Cephalopelvic disproportion<br>(59.2) | Cephalopelvic disproportion<br>(52.9) | Cephalopelvic disproportion<br>(72.7) |
|                               | Previous caesarean section<br>(36.7)  | Any other fetal indication<br>(26.5)  | Any other fetal indication<br>(30.3)  |
|                               | Any other fetal indication<br>(26.5)  | Maternal request (17.7)               | Previous caesarean section<br>(21.2)  |
| <b>Birthweight percentile</b> |                                       |                                       |                                       |
| P90–P94                       | Cephalopelvic disproportion<br>(41.7) | Cephalopelvic disproportion<br>(29.0) | Previous caesarean section<br>(34.6)  |
|                               | Fetal distress (27.1)                 | Previous caesarean section<br>(25.9)  | Cephalopelvic disproportion<br>(31.3) |
|                               | Previous caesarean section<br>(26.3)  | Fetal distress (16.4)                 | Fetal distress (17.3)                 |
| P95–P96                       | Cephalopelvic disproportion<br>(36.9) | Cephalopelvic disproportion<br>(28.0) | Cephalopelvic disproportion<br>(35.4) |
|                               | Fetal distress (26.6)                 | Previous caesarean section<br>(26.7)  | Previous caesarean section<br>(34.0)  |
|                               | Previous caesarean section<br>(26.2)  | Fetal distress (18.6)                 | Fetal distress (18.2)                 |
| ≥P97                          | Cephalopelvic disproportion<br>(49.0) | Cephalopelvic disproportion<br>(32.8) | Cephalopelvic disproportion<br>(37.5) |
|                               | Previous caesarean section<br>(27.3)  | Previous caesarean section<br>(28.4)  | Previous caesarean section<br>(33.2)  |
|                               | Fetal distress (24.1)                 | Fetal distress (16.3)                 | Fetal distress (15.7)                 |
