# Supplementary material for: Searching for the definition of macrosomia through an outcome-based approach in low- and middle-income countries: a secondary analysis of the WHO Global Survey in Africa, Asia and Latin America
Source: Springer Nature journal article supplement (doi:10.1186/s12884-015-0765-z), 2015-12-01
Supplement: MOESM3 [file 9743624]

**Additional Table 3 Prevalence and adjusted odds ratios of maternal and perinatal mortality and morbidity by birthweight in singleton term infants excluding pre-labor cesarean deliveries**

| Birthweight<br>(g)   | Maternal mortality and morbidity |                                      | Perinatal mortality and morbidity |                                      |
|----------------------|----------------------------------|--------------------------------------|-----------------------------------|--------------------------------------|
|                      | Prevalence<br>(%)                | Adjusted OR<br>(95% CI) <sup>a</sup> | Prevalence (%)                    | Adjusted OR<br>(95% CI) <sup>a</sup> |
| <b>Africa</b>        | <b>N=63325</b>                   |                                      |                                   |                                      |
| 3000–3499            | 4.4                              | 1.00                                 | 4.3                               | 1.00                                 |
| 3500–3999            | 5.4                              | 1.14 (1.02, 1.26)                    | 3.9                               | 0.93 (0.83, 1.04)                    |
| 4000–4099            | 7.5                              | 1.53 (1.25, 1.88)                    | 3.7                               | 0.97 (0.75, 1.26)                    |
| 4100–4199            | 7.3                              | 1.41 (0.99, 2.01)                    | 3.3                               | 0.96 (0.60, 1.53)                    |
| 4200–4299            | 7.5                              | 1.46 (1.04, 2.04)                    | 2.9                               | 0.80 (0.49, 1.30)                    |
| 4300–4399            | 9.1                              | 1.45 (0.95, 2.22)                    | 4.4                               | 1.22 (0.71, 2.10)                    |
| 4400–4499            | 10.9                             | 2.07 (1.24, 3.47)                    | 3.5                               | 1.29 (0.60, 2.80)                    |
| 4500–4999            | 9.8                              | 1.50 (1.08, 2.07)                    | 5.0                               | 1.35 (0.90, 2.03)                    |
| ≥5000                | 16.2                             | 3.20 (1.82, 5.60)                    | 17.1                              | 5.12 (3.01, 8.72)                    |
| <b>Asia</b>          | <b>N=77399</b>                   |                                      |                                   |                                      |
| 3000–3499            | 4.7                              | 1.00                                 | 1.6                               | 1.00                                 |
| 3500–3999            | 5.6                              | 1.38 (1.24, 1.55)                    | 1.4                               | 1.05 (0.87, 1.26)                    |
| 4000–4099            | 6.2                              | 2.04 (1.42, 2.92)                    | 1.9                               | 1.42 (0.81, 2.50)                    |
| 4100–4199            | 8.0                              | 2.32 (1.47, 3.68)                    | 1.2                               | 1.03 (0.38, 2.81)                    |
| 4200–4299            | 5.6                              | 2.46 (1.29, 4.69)                    | 3.3                               | 2.49 (1.15, 5.38)                    |
| 4300–4399            | 12.9                             | 4.80 (2.61, 8.81)                    | 4.8                               | 3.61 (1.54, 8.46)                    |
| 4400–4499            | 9.5                              | 4.32 (1.65, 11.35)                   | 6.3                               | 5.24 (1.83, 14.97)                   |
| 4500–4999            | 11.9                             | 3.47 (1.81, 6.62)                    | 7.6                               | 5.38 (2.64, 10.95)                   |
| ≥5000                | 22.9                             | 7.97 (3.07, 20.71)                   | 28.6                              | 32.41 (14.53, 70.96)                 |
| <b>Latin America</b> | <b>N=67782</b>                   |                                      |                                   |                                      |
| 3000–3499            | 2.2                              | 1.00                                 | 1.9                               | 1.00                                 |
| 3500–3999            | 2.3                              | 1.12 (0.98, 1.28)                    | 2.0                               | 0.96 (0.83, 1.10)                    |
| 4000–4099            | 2.8                              | 1.49 (1.04, 2.13)                    | 2.1                               | 1.03 (0.69, 1.55)                    |
| 4100–4199            | 1.9                              | 0.98 (0.57, 1.68)                    | 1.8                               | 0.83 (0.48, 1.46)                    |
| 4200–4299            | 2.2                              | 0.98 (0.53, 1.82)                    | 2.9                               | 1.36 (0.82, 2.27)                    |
| 4300–4399            | 2.9                              | 1.42 (0.74, 2.70)                    | 2.3                               | 1.03 (0.51, 2.11)                    |
| 4400–4499            | 2.6                              | 1.21 (0.48, 3.03)                    | 2.6                               | 1.17 (0.47, 2.88)                    |
| 4500–4999            | 3.5                              | 1.70 (0.93, 3.10)                    | 3.2                               | 1.44 (0.78, 2.66)                    |
| ≥5000                | 3.0                              | 1.09 (0.13, 9.03)                    | 15.2                              | 7.22 (2.71, 19.26)                   |

a: All estimates were based on two-level logistic regression models. Facilities represent units at level two and individuals within facilities are observations at level one. We adjusted for country, maternal age, marital status, education (total years of school attendance), obesity, diabetes, parity, infant sex, and gestational age.

**Additional Table 4 Prevalence and adjusted odds ratios of maternal and perinatal mortality and morbidity by birthweight in singleton term infants born through vaginal deliveries**

| Birthweight<br>(g)   | Maternal mortality and morbidity |                                      | Perinatal mortality and morbidity |                                      |
|----------------------|----------------------------------|--------------------------------------|-----------------------------------|--------------------------------------|
|                      | Prevalence<br>(%)                | Adjusted OR<br>(95% CI) <sup>a</sup> | Prevalence (%)                    | Adjusted OR<br>(95% CI) <sup>a</sup> |
| <b>Africa</b>        | N= 59453                         |                                      |                                   |                                      |
| 3000–3499            | 3.3                              | 1.00                                 | 3.8                               | 1.00                                 |
| 3500–3999            | 4.0                              | 1.10 (0.97, 1.25)                    | 3.3                               | 0.90 (0.79, 1.01)                    |
| 4000–4099            | 5.8                              | 1.44 (1.12, 1.86)                    | 2.9                               | 0.82 (0.61, 1.12)                    |
| 4100–4199            | 4.7                              | 1.19 (0.75, 1.89)                    | 2.5                               | 0.81 (0.47, 1.42)                    |
| 4200–4299            | 4.6                              | 1.25 (0.78, 2.00)                    | 2.2                               | 0.71 (0.39, 1.29)                    |
| 4300–4399            | 5.6                              | 0.99 (0.55, 1.77)                    | 4.0                               | 1.25 (0.69, 2.30)                    |
| 4400–4499            | 8.3                              | 2.19 (1.15, 4.16)                    | 2.8                               | 1.14 (0.46, 2.84)                    |
| 4500–4999            | 6.7                              | 1.21 (0.79, 1.85)                    | 4.0                               | 1.23 (0.75, 2.01)                    |
| ≥5000                | 11.5                             | 2.39 (1.15, 4.96)                    | 16.7                              | 5.49 (3.06, 9.86)                    |
| <b>Asia</b>          | N= 65956                         |                                      |                                   |                                      |
| 3000–3499            | 3.3                              | 1.00                                 | 1.5                               | 1.00                                 |
| 3500–3999            | 3.3                              | 1.25 (1.04, 1.49)                    | 1.3                               | 0.94 (0.75, 1.17)                    |
| 4000–4099            | 2.2                              | 1.42 (0.69, 2.93)                    | 1.8                               | 1.35 (0.66, 2.77)                    |
| 4100–4199            | 1.9                              | 0.66 (0.18, 2.45)                    | 1.9                               | 1.78 (0.65, 4.88)                    |
| 4200–4299            | 3.3                              | 2.56 (0.90, 7.24)                    | 2.4                               | 1.76 (0.55, 5.65)                    |
| 4300–4399            | 1.4                              | 0.88 (0.11, 7.10)                    | 5.8                               | 4.77 (1.66, 13.73)                   |
| 4400–4499            | 3.0                              | 4.12 (0.54, 31.68)                   | 3.0                               | 2.24 (0.29, 17.04)                   |
| 4500–4999            | 6.9                              | 3.77 (1.13, 12.61)                   | 6.9                               | 4.51 (1.58, 12.90)                   |
| ≥5000                | 22.2                             | 4.72 (1.27, 17.52)                   | 38.9                              | 70.37 (24.41, 202.9)                 |
| <b>Latin America</b> | N= 57778                         |                                      |                                   |                                      |
| 3000–3499            | 2.2                              | 1.00                                 | 1.8                               | 1.00                                 |
| 3500–3999            | 2.3                              | 1.12 (0.97, 1.29)                    | 1.7                               | 0.92 (0.78, 1.08)                    |
| 4000–4099            | 2.6                              | 1.41 (0.92, 2.16)                    | 1.7                               | 0.96 (0.58, 1.59)                    |
| 4100–4199            | 2.2                              | 1.14 (0.63, 2.06)                    | 1.6                               | 0.92 (0.47, 1.79)                    |
| 4200–4299            | 2.1                              | 0.93 (0.43, 1.99)                    | 2.3                               | 1.22 (0.62, 2.40)                    |
| 4300–4399            | 2.6                              | 1.29 (0.56, 2.95)                    | 2.1                               | 1.06 (0.43, 2.61)                    |
| 4400–4499            | 3.7                              | 1.75 (0.68, 4.5)                     | 3.0                               | 1.48 (0.54, 4.08)                    |
| 4500–4999            | 2.9                              | 1.38 (0.59, 3.19)                    | 4.3                               | 2.34 (1.17, 4.65)                    |
| ≥5000                | 4.5                              | 2.11 (0.25, 17.97)                   | 18.2                              | 10.30 (3.35, 31.68)                  |

a: All estimates were based on two-level logistic regression models. Facilities represent units at level two and individuals within facilities are observations at level one. We adjusted for country, maternal age, marital status, education (total years of school attendance), obesity, diabetes, parity, infant sex, and gestational age.

**Additional Table 5 Prevalence and adjusted odds ratios of maternal and perinatal mortality and morbidity by birthweight in singleton term infants in countries with less than 10% of missing value for BMI**

| Birthweight          | Maternal mortality and morbidity |                                   | Perinatal mortality and morbidity |                                   |
|----------------------|----------------------------------|-----------------------------------|-----------------------------------|-----------------------------------|
|                      | Prevalence (%)                   | Adjusted OR (95% CI) <sup>a</sup> | Prevalence (%)                    | Adjusted OR (95% CI) <sup>a</sup> |
| <b>Africa</b>        | <b>N=36325</b>                   |                                   |                                   |                                   |
| 3000–3499            | 9.6                              | 1.00                              | 3.5                               | 1.00                              |
| 3500–3999            | 10.8                             | 1.10 (1.00, 1.21)                 | 2.7                               | 0.83 (0.70, 0.98)                 |
| <b>4000–4099</b>     | 13.9                             | 1.47 (1.21, 1.79)                 | 3.4                               | 0.84 (0.59, 1.19)                 |
| <b>4100–4199</b>     | 13.7                             | 1.44 (1.07, 1.94)                 | 2.4                               | 0.82 (0.44, 1.54)                 |
| 4200–4299            | 15.5                             | 1.66 (1.26, 2.19)                 | 3.1                               | 0.95 (0.55, 1.63)                 |
| 4300–4399            | 18.6                             | 1.62 (1.14, 2.29)                 | 1.9                               | 0.59 (0.23, 1.47)                 |
| <b>4400–4499</b>     | 20.6                             | 2.34 (1.54, 3.56)                 | 2.4                               | 0.89 (0.32, 2.44)                 |
| 4500–4999            | 18.7                             | 1.81 (1.39, 2.35)                 | 3.6                               | 1.00 (0.59, 1.68)                 |
| ≥5000                | 25.6                             | 3.42 (2.14, 5.47)                 | 12.4                              | 3.26 (1.82, 5.86)                 |
| <b>Asia</b>          | <b>N=91595</b>                   |                                   |                                   |                                   |
| 3000–3499            | 4.7                              | 1.00                              | 1.7                               | 1.00                              |
| 3500–3999            | 5.4                              | 1.38 (1.24, 1.52)                 | 1.6                               | 1.05 (0.9, 1.24)                  |
| 4000–4099            | 5.4                              | 1.86 (1.35, 2.56)                 | 2.1                               | 1.49 (0.94, 2.35)                 |
| <b>4100–4199</b>     | 6.7                              | 2.25 (1.50, 3.38)                 | 1.2                               | 1.01 (0.45, 2.29)                 |
| 4200–4299            | 5.0                              | 2.03 (1.17, 3.52)                 | 4.1                               | 2.80 (1.58, 4.99)                 |
| 4300–4399            | 11.5                             | 4.42 (2.60, 7.50)                 | 3.3                               | 2.44 (1.06, 5.64)                 |
| 4400–4499            | 7.9                              | 3.81 (1.68, 8.60)                 | 4.0                               | 2.99 (1.07, 8.34)                 |
| 4500–4999            | 10.0                             | 3.38 (1.99, 5.74)                 | 6.0                               | 4.12 (2.24, 7.56)                 |
| ≥5000                | 17.3                             | 7.51 (3.25, 17.33)                | 26.9                              | 28.44 (14.81, 54.61)              |
| <b>Latin America</b> | <b>N=49909</b>                   |                                   |                                   |                                   |
| 3000–3499            | 3.0                              | 1.00                              | 1.5                               | 1.00                              |
| 3500–3999            | 3.1                              | 1.05 (0.92, 1.20)                 | 1.4                               | 0.97 (0.80, 1.18)                 |
| 4000–4099            | 3.3                              | 1.17 (0.79, 1.72)                 | 1.7                               | 1.19 (0.70, 2.02)                 |
| 4100–4199            | 2.3                              | 0.82 (0.44, 1.52)                 | 1.5                               | 1.11 (0.52, 2.37)                 |
| 4200–4299            | 3.4                              | 1.14 (0.64, 2.02)                 | 2.6                               | 1.89 (0.99, 3.59)                 |
| 4300–4399            | 3.4                              | 1.26 (0.61, 2.60)                 | 0.9                               | 0.68 (0.17, 2.75)                 |
| 4400–4499            | 3.4                              | 1.11 (0.44, 2.79)                 | 2.8                               | 2.01 (0.73, 5.53)                 |
| <b>4500–4999</b>     | 5.0                              | 1.67 (0.97, 2.88)                 | 4.3                               | 3.15 (1.76, 5.64)                 |
| ≥5000                | 12.0                             | 3.82 (1.04, 14.06)                | 12.0                              | 8.93 (2.60, 30.67)                |

a: All estimates are based on two-level logistic regression models. Facilities represent units at level two and individuals within facilities are observations at level one. We adjusted for country, maternal age, marital status, education (total years of school attendance), obesity, diabetes, parity, infant sex and gestational age.

**Additional Table 6 Prevalence and adjusted odds ratios of maternal and perinatal mortality and morbidity by birthweight centile in singleton term infants in countries with less than 10% of missing value for BMI**

| Birthweight centile              | Maternal mortality and morbidity |                                      | Perinatal mortality and morbidity |                                      |
|----------------------------------|----------------------------------|--------------------------------------|-----------------------------------|--------------------------------------|
|                                  | Prevalence (%)                   | Adjusted OR (95% CI) <sup>a, c</sup> | Prevalence (%)                    | Adjusted OR (95% CI) <sup>a, c</sup> |
| <b>Africa</b>                    | <b>N=36325</b>                   |                                      |                                   |                                      |
| P <sub>50</sub> -P <sub>74</sub> | 9.5                              | 1.00                                 | 3.4                               | 1.00                                 |
| P <sub>75</sub> -P <sub>89</sub> | 10.5                             | 1.24 (1.10, 1.40)                    | 2.6                               | 0.85 (0.69, 1.06)                    |
| P <sub>90</sub> -P <sub>94</sub> | 9.6                              | 1.10 (0.93, 1.29)                    | 4.1                               | 1.08 (0.85, 1.38)                    |
| P <sub>95</sub> -P <sub>96</sub> | 10.9                             | 1.46 (1.15, 1.86)                    | 4.1                               | 1.15 (0.80, 1.66)                    |
| ≥P <sub>97</sub>                 | 13.0                             | 1.70 (1.48, 1.96)                    | 4.4                               | 1.07 (0.85, 1.33)                    |
| <b>Asia</b>                      | <b>N=91595</b>                   |                                      |                                   |                                      |
| P <sub>50</sub> -P <sub>74</sub> | 5.0                              | 1.00                                 | 1.8                               | 1.00                                 |
| P <sub>75</sub> -P <sub>89</sub> | 5.1                              | 1.03 (0.92, 1.15)                    | 2.0                               | 1.02 (0.86, 1.19)                    |
| P <sub>90</sub> -P <sub>94</sub> | 4.8                              | 1.04 (0.89, 1.21)                    | 1.7                               | 0.88 (0.70, 1.11)                    |
| P <sub>95</sub> -P <sub>96</sub> | 5.1                              | 1.20 (0.98, 1.46)                    | 2.4                               | 1.08 (0.83, 1.41)                    |
| ≥P <sub>97</sub>                 | 6.4                              | 1.41 (1.25, 1.59)                    | 2.5                               | 1.12 (0.94, 1.34)                    |
| <b>Latin America</b>             | <b>N=49909</b>                   |                                      |                                   |                                      |
| P <sub>50</sub> -P <sub>74</sub> | 3.0                              | 1.00                                 | 1.3                               | 1.00                                 |
| P <sub>75</sub> -P <sub>89</sub> | 3.1                              | 1.06 (0.89, 1.26)                    | 1.5                               | 1.11 (0.86, 1.42)                    |
| P <sub>90</sub> -P <sub>94</sub> | 3.0                              | 1.04 (0.82, 1.32)                    | 1.1                               | 0.82 (0.56, 1.19)                    |
| P <sub>95</sub> -P <sub>96</sub> | 3.1                              | 1.09 (0.78, 1.51)                    | 1.8                               | 1.23 (0.79, 1.90)                    |
| ≥P <sub>97</sub>                 | 3.3                              | 1.15 (0.93, 1.43)                    | 2.2                               | 1.49 (1.14, 1.96)                    |

a: All estimates are based on two-level logistic regression models. Facilities represent units at level two and individuals within facilities are observations at level one. We adjusted for country, maternal age, marital status, education (total years of school attendance), obesity, diabetes, parity, infant sex, and gestational age.

**Additional Table 7 Prevalence and adjusted odds ratios of maternal and perinatal mortality and morbidity by birthweight with exclusion of obesity and diabetes from the regression models in singleton term infants**

| Birthweight          | Maternal mortality and morbidity |                                   | Perinatal mortality and morbidity |                                   |
|----------------------|----------------------------------|-----------------------------------|-----------------------------------|-----------------------------------|
|                      | Prevalence (%)                   | Adjusted OR (95% CI) <sup>a</sup> | Prevalence (%)                    | Adjusted OR (95% CI) <sup>a</sup> |
| <b>Africa</b>        | <b>N=67546</b>                   |                                   |                                   |                                   |
| 3000–3499            | 6.0                              | 1.00                              | 4.6                               | 1.00                              |
| 3500–3999            | 7.2                              | 1.10 (1.01, 1.20)                 | 4.2                               | 0.95 (0.85, 1.05)                 |
| <b>4000–4099</b>     | 9.2                              | 1.45 (1.22, 1.73)                 | 4.0                               | 0.98 (0.77, 1.24)                 |
| <b>4100–4199</b>     | 10.6                             | 1.51 (1.14, 1.99)                 | 3.4                               | 0.93 (0.60, 1.44)                 |
| 4200–4299            | 11.7                             | 1.62 (1.25, 2.11)                 | 3.4                               | 0.87 (0.56, 1.34)                 |
| 4300–4399            | 14.3                             | 1.74 (1.26, 2.42)                 | 5.0                               | 1.32 (0.81, 2.14)                 |
| <b>4400–4499</b>     | <b>15.5</b>                      | 2.32 (1.55, 3.48)                 | 3.8                               | 1.26 (0.64, 2.51)                 |
| 4500–4999            | 15.0                             | 1.89 (1.47, 2.42)                 | 5.4                               | 1.38 (0.95, 1.99)                 |
| ≥5000                | 21.2                             | 3.27 (2.08, 5.12)                 | 14.4                              | 4.06 (2.44, 6.73)                 |
| <b>Asia</b>          | <b>N=91595</b>                   |                                   |                                   |                                   |
| 3000–3499            | 4.7                              | 1.00                              | 1.7                               | 1.00                              |
| 3500–3999            | 5.4                              | 1.38 (1.25, 1.53)                 | 1.6                               | 1.07 (0.91, 1.26)                 |
| 4000–4099            | 5.4                              | 1.87 (1.36, 2.58)                 | 2.1                               | 1.55 (0.98, 2.44)                 |
| <b>4100–4199</b>     | 6.7                              | 2.26 (1.51, 3.40)                 | 1.2                               | 1.07 (0.47, 2.42)                 |
| 4200–4299            | 5.0                              | 2.05 (1.18, 3.56)                 | 4.1                               | 3.06 (1.72, 5.42)                 |
| 4300–4399            | 11.5                             | 4.46 (2.63, 7.57)                 | 3.3                               | 2.61 (1.13, 6.03)                 |
| 4400–4499            | 7.9                              | 3.86 (1.71, 8.70)                 | 4.0                               | 3.43 (1.24, 9.49)                 |
| 4500–4999            | 10.0                             | 3.45 (2.04, 5.85)                 | 6.0                               | 4.52 (2.47, 8.28)                 |
| ≥5000                | 17.3                             | 7.52 (3.25, 17.39)                | 27.0                              | 31.51 (16.52, 60.12)              |
| <b>Latin America</b> | <b>N=87518</b>                   |                                   |                                   |                                   |
| 3000–3499            | 2.4                              | 1.00                              | 2.1                               | 1.00                              |
| 3500–3999            | 2.6                              | 1.14 (1.02, 1.28)                 | 2.0                               | 0.95 (0.84, 1.07)                 |
| 4000–4099            | 3.0                              | 1.44 (1.07, 1.93)                 | 2.3                               | 1.08 (0.78, 1.51)                 |
| 4100–4199            | 2.7                              | 1.27 (0.86, 1.89)                 | 2.2                               | 0.99 (0.64, 1.52)                 |
| 4200–4299            | 2.5                              | 1.11 (0.69, 1.77)                 | 2.8                               | 1.27 (0.81, 1.98)                 |
| 4300–4399            | 3.0                              | 1.33 (0.77, 2.30)                 | 2.2                               | 0.94 (0.50, 1.78)                 |
| 4400–4499            | 2.9                              | 1.19 (0.57, 2.45)                 | 2.9                               | 1.27 (0.62, 2.59)                 |
| <b>4500–4999</b>     | 3.5                              | 1.55 (0.98, 2.47)                 | 4.0                               | 1.88 (1.22, 2.89)                 |
| ≥5000                | 5.5                              | 2.39 (0.70, 8.13)                 | 16.4                              | 8.07 (3.84, 16.95)                |

a: Data are adjusted odds ratio (95% CI). All estimates are based on two-level logistic regression models. Facilities represent units at level two and individuals within facilities are observations at level one. We adjusted for country, maternal age, marital status, education (total years of school attendance, ref ≥ 13 years), parity, infant sex, and gestational age.

**Additional Table 8 Prevalence and adjusted odds ratios of maternal and perinatal mortality and morbidity by birthweight centile with exclusion of obesity and diabetes from the regression models in singleton term infants**

| Birthweight centile              | Maternal mortality and morbidity |                                   | Perinatal mortality and morbidity |                                   |
|----------------------------------|----------------------------------|-----------------------------------|-----------------------------------|-----------------------------------|
|                                  | Prevalence (%)                   | Adjusted OR (95% CI) <sup>a</sup> | Prevalence (%)                    | Adjusted OR (95% CI) <sup>a</sup> |
| <b>Africa</b>                    | <b>N=67546</b>                   |                                   |                                   |                                   |
| P <sub>50</sub> -P <sub>74</sub> | 6.3                              | 1.00                              | 4.3                               | 1.00                              |
| P <sub>75</sub> -P <sub>89</sub> | 6.6                              | 1.18 (1.05, 1.31)                 | 4.3                               | 0.98 (0.86, 1.12)                 |
| P <sub>90</sub> -P <sub>94</sub> | 5.7                              | 1.09 (0.95, 1.26)                 | 5.0                               | 1.08 (0.92, 1.26)                 |
| P <sub>95</sub> -P <sub>96</sub> | 6.6                              | 1.31 (1.06, 1.62)                 | 5.4                               | 1.14 (0.91, 1.44)                 |
| ≥P <sub>97</sub>                 | 7.2                              | 1.57 (1.39, 1.78)                 | 5.8                               | 1.11 (0.97, 1.27)                 |
| <b>Asia</b>                      | <b>N=91595</b>                   |                                   |                                   |                                   |
| P <sub>50</sub> -P <sub>74</sub> | 5.0                              | 1.00                              | 1.8                               | 1.00                              |
| P <sub>75</sub> -P <sub>89</sub> | 5.1                              | 1.03 (0.92, 1.15)                 | 2.0                               | 1.02 (0.87, 1.20)                 |
| P <sub>90</sub> -P <sub>94</sub> | 4.8                              | 1.04 (0.89, 1.21)                 | 1.7                               | 0.89 (0.71, 1.12)                 |
| P <sub>95</sub> -P <sub>96</sub> | 5.1                              | 1.20 (0.99, 1.46)                 | 2.4                               | 1.10 (0.84, 1.42)                 |
| ≥P <sub>97</sub>                 | 6.4                              | 1.42 (1.26, 1.61)                 | 2.5                               | 1.16 (0.97, 1.38)                 |
| <b>Latin America</b>             | <b>N=87518</b>                   |                                   |                                   |                                   |
| P <sub>50</sub> -P <sub>74</sub> | 2.4                              | 1.00                              | 2.0                               | 1.00                              |
| P <sub>75</sub> -P <sub>89</sub> | 2.7                              | 1.13 (0.98, 1.31)                 | 2.2                               | 1.08 (0.93, 1.27)                 |
| P <sub>90</sub> -P <sub>94</sub> | 2.6                              | 1.06 (0.87, 1.29)                 | 1.8                               | 0.88 (0.70, 1.11)                 |
| P <sub>95</sub> -P <sub>96</sub> | 2.9                              | 1.21 (0.92, 1.58)                 | 2.1                               | 0.97 (0.71, 1.33)                 |
| ≥P <sub>97</sub>                 | 3.0                              | 1.24 (1.04, 1.48)                 | 2.8                               | 1.33 (1.11, 1.60)                 |

a: Data are adjusted odds ratio (95% CI). All estimates are based on two-level logistic regression models. Facilities represent units at level two and individuals within facilities are observations at level one. We adjusted for country, maternal age, marital status, education (total years of school attendance, ref ≥ 13 years), parity, infant sex, and gestational age.
